# Supplementary material
Source: PubMed Central journal article supplement (PMC6120668)

**Figure 1**

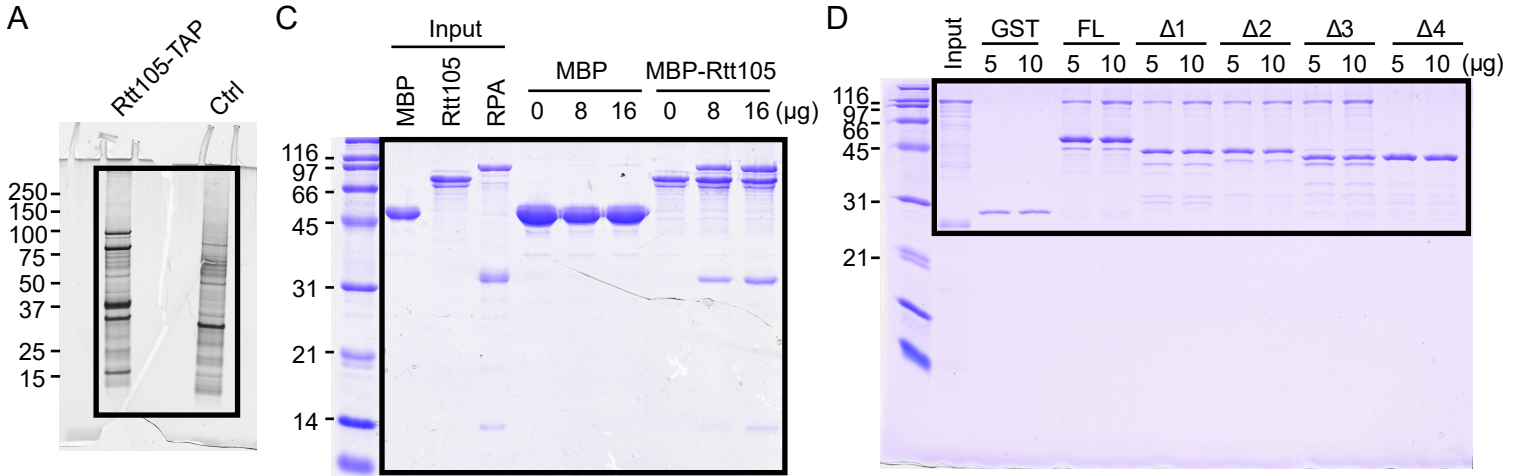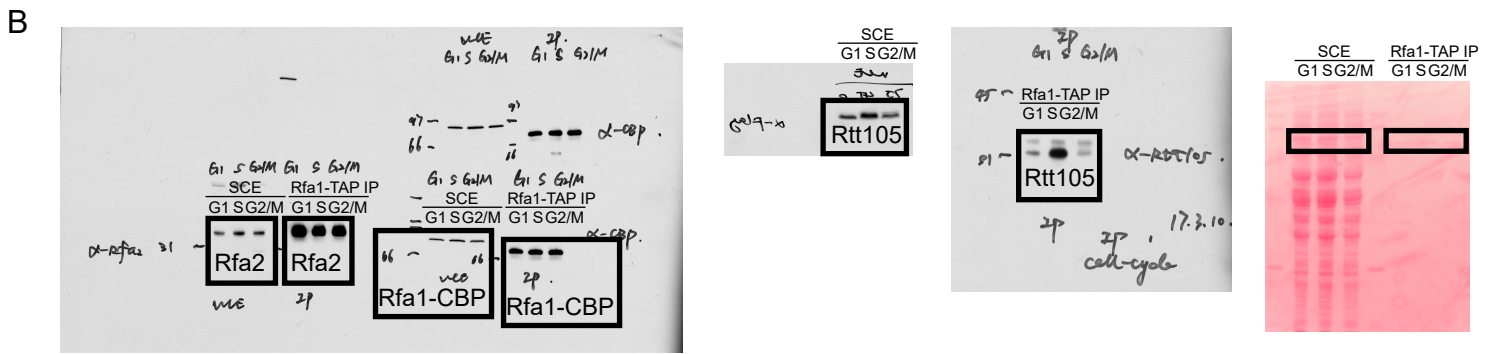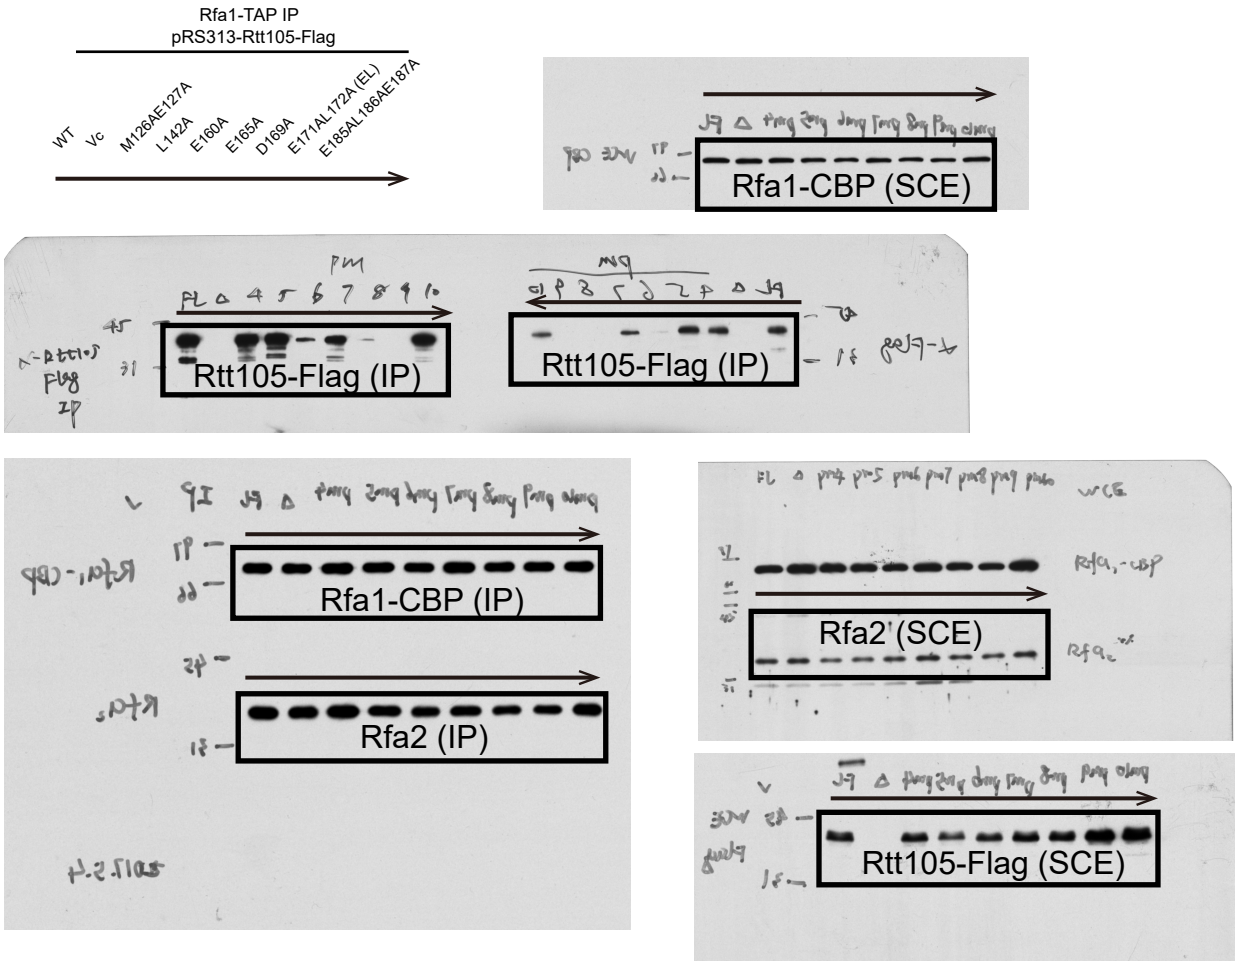

Supplement: EMBJ-37-e99154-s006.pdf [file EMBJ-37-e99154-s006.pdf]

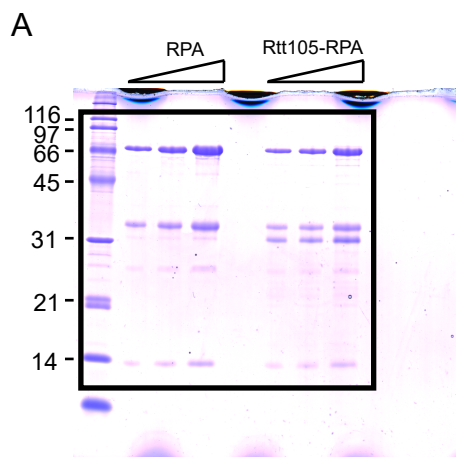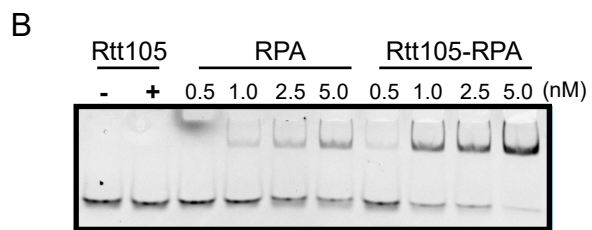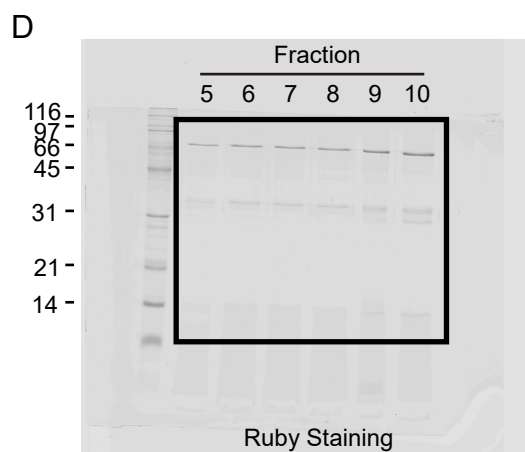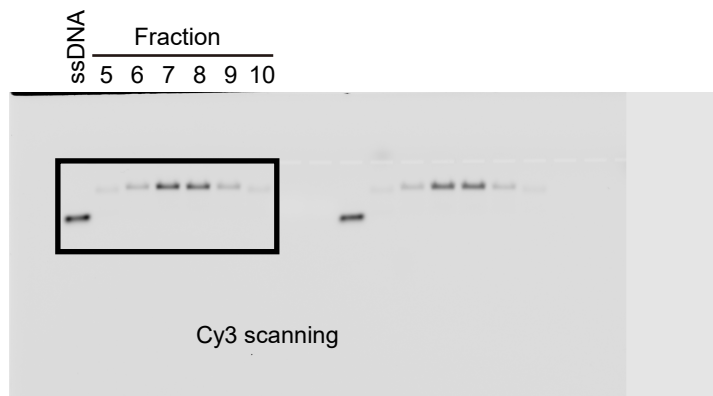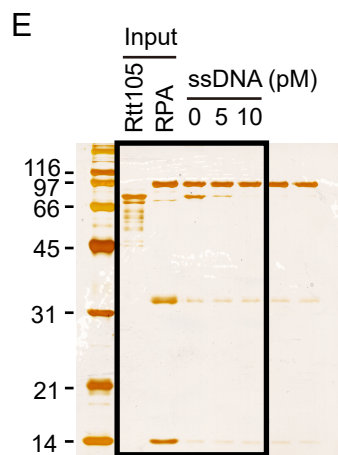

Supplement: EMBJ-37-e99154-s007.pdf [file EMBJ-37-e99154-s007.pdf]

F

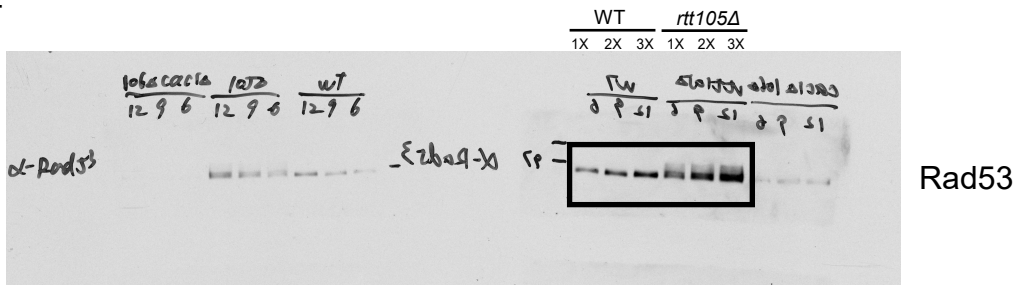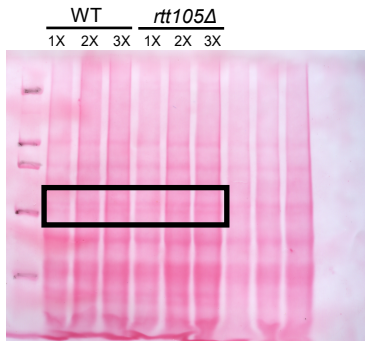

Supplement: EMBJ-37-e99154-s008.pdf [file EMBJ-37-e99154-s008.pdf]
